# Supplementary material for: CARFMAP: A Curated Pathway Map of Cardiac Fibroblasts
Source: PubMed Central journal article supplement (PMC4684407; doi:10.1371/journal.pone.0143274), 2015-12-16

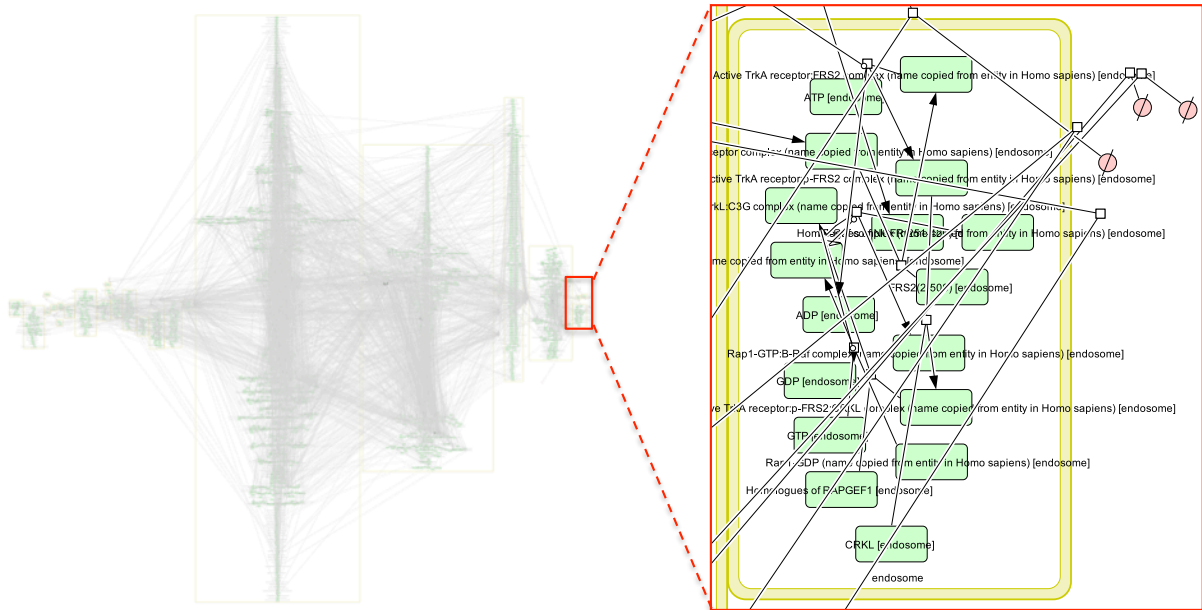

Supplement: pone.0143274.s003.pdf [file pone.0143274.s003.pdf]
