# Supplementary material for: CARFMAP: A Curated Pathway Map of Cardiac Fibroblasts
Source: PubMed Central journal article supplement (PMC4684407; doi:10.1371/journal.pone.0143274), 2015-12-16
Supplement: pone.0143274.s005.pdf [file pone.0143274.s005.pdf]

| <b>Genes</b> | <b>Functions</b>                                                                  | <b>References</b>       |
|--------------|-----------------------------------------------------------------------------------|-------------------------|
| Mmp3         | extracellular matrix remodelling, collagen degradation                            | Ye 1996                 |
| Il6          | inflammatory cytokine production, protein synthesis                               | Wagner 1996,<br>Ma 2012 |
| Edn1         | vasoconstriction                                                                  | Bruno 2003              |
| Pdgfc        | palatogenesis, tissue morphogenesis                                               | Choi 2009               |
| Fgf10        | embryonic development, cell growth, morphogenesis,<br>tissue repair, tumor growth | Plichta 2012            |
