# Supplementary material for: CARFMAP: A Curated Pathway Map of Cardiac Fibroblasts
Source: PubMed Central journal article supplement (PMC4684407; doi:10.1371/journal.pone.0143274), 2015-12-16
Supplement: pone.0143274.s006.pdf [file pone.0143274.s006.pdf]

| Criteria       | Number of genes | Contain all 5 genes (Mmp3, Il6, Edn1, Pdgfc, and Fgf10)? |
|----------------|-----------------|----------------------------------------------------------|
| $p < 0.1$      | 7626            | Yes                                                      |
| $p < 0.01$     | 1733            | No                                                       |
| $AbsLogFC > 2$ | 686             | Yes                                                      |
| $AbsLogFC > 4$ | 47              | No                                                       |
